# Supplementary material for: Hyaluronic acid-functionalized polymeric nanoparticles for colon cancer-targeted combination chemotherapy
Source: Royal Society of Chemistry journal article supplement (doi:10.1039/c5nr04831a), 2015-01-01

## Supporting Information

### **Hyaluronic acid-functionalized polymeric nanoparticles for colon cancer-targeted combination chemotherapy**

Bo Xiao<sup>a,b\*</sup>, Moon Kwon Han<sup>b</sup>, Emilie Viennois<sup>b,c</sup>, Lixin Wang<sup>b,c</sup>, Mingzhen Zhang<sup>b</sup>, Xiaoying Si<sup>a</sup>, Didier Merlin<sup>b,c</sup>

<sup>a</sup>Institute for Clean Energy and Advanced Materials, Faculty for Materials and Energy, Southwest University, Chongqing, 400715, P. R. China

<sup>b</sup>Center for Diagnostics and Therapeutics, Institute for Biomedical Science, Georgia State University, Atlanta, 30302, USA

<sup>c</sup>Atlanta Veterans Affairs Medical Center, Decatur, 30033, USA

\*Author for correspondence

Tel.: +1 (404) 413 3597

Fax: +1 (404) 413 3580

Email: [bxiao@gsu.edu](mailto:bxiao@gsu.edu)

Supplementary Figure 1. Representative flow cytometry plots of cells incubated with or without cationic CPT/CUR-NPs (1:1) for 3 h.

**Supplementary Figure 1.**

Xiao B. et al.

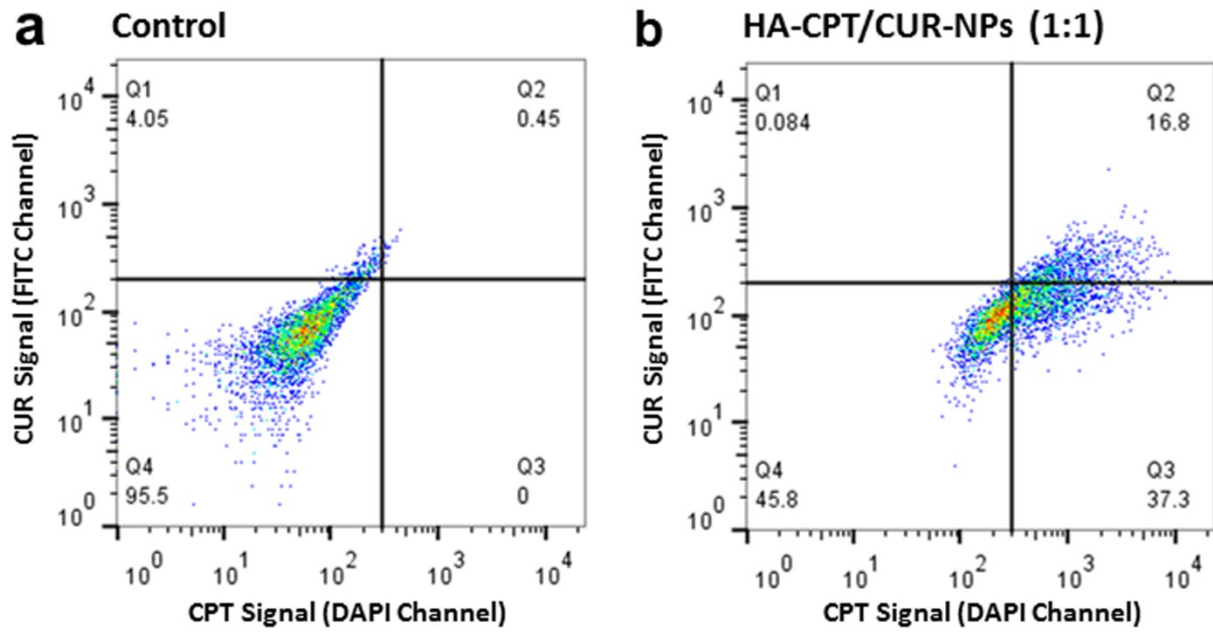

Supplementary Figure 2. Cytotoxicity of blank chitosan-coated NPs and blank HA-functionalized NPs at different concentrations against Colon-26 cells after 48 h of co-incubation.

**Supplementary Figure 2.**

Xiao B. et al.

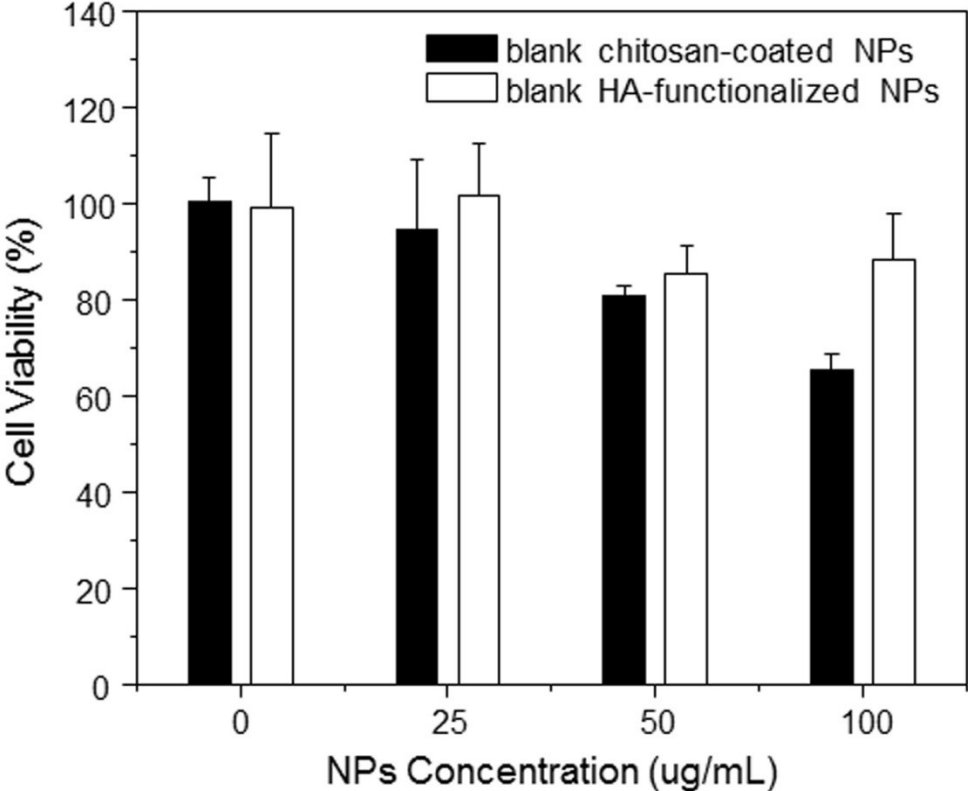

Supplement: c5nr04831a1.pdf [file c5nr04831a1.pdf]
